# Supplementary material for: Single-cell transcriptomics and cell-specific proteomics reveals molecular signatures of sleep
Source: PubMed Central journal article supplement (PMC9391396; doi:10.1038/s42003-022-03800-3), 2022-08-19
Supplement: 42003_2022_3800_MOESM2_ESM.pdf [file 42003_2022_3800_MOESM2_ESM.pdf]

## **Supplementary Information**

### **Single-cell transcriptomics and cell-specific proteomics reveals molecular signatures of sleep**

Pawan K. Jha, Utham K. Valekunja, Sandipan Ray, Mathieu Nollet & Akhilesh B. Reddy

**Supplementary Information** (available in this document)

Supplementary Figures 1 – 8

Supplementary Table 1-10

Supplementary References

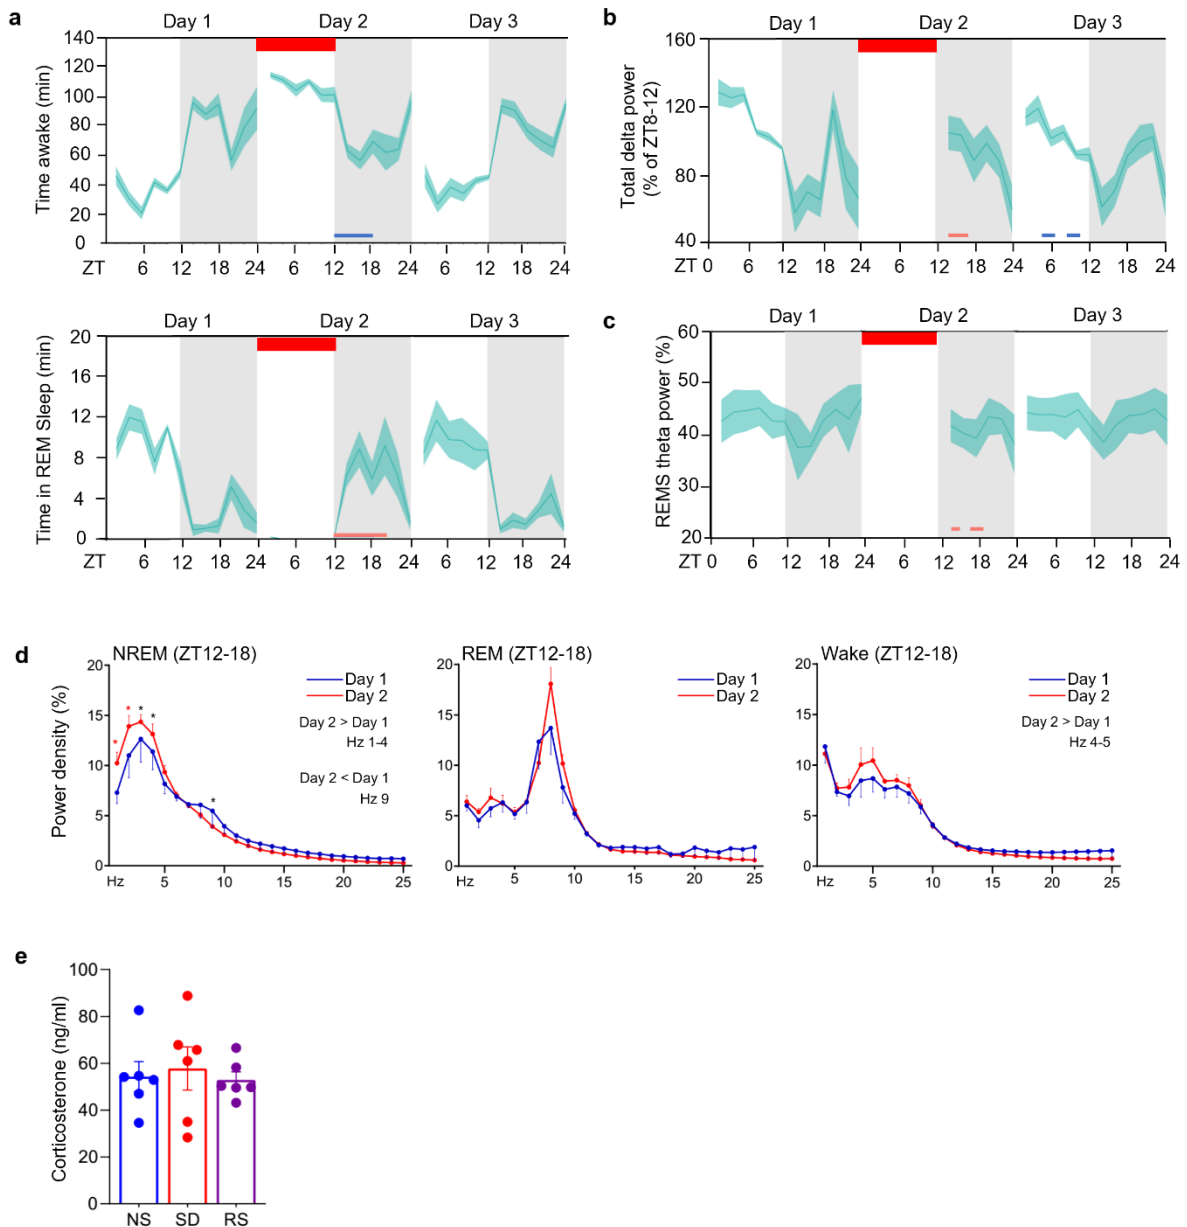

### Supplementary Fig. 1: Sleep phenotyping and plasma corticosterone measurements during sleep treatments

**a, b, c** Ribbon plots showing the time course of 2 hourly binned values of **(a)** wake and REM sleep states, **(b)** total delta ( $\delta$ )-power percentage of ZT8-12 from Day 1 and **(c)** REMS theta ( $\theta$ )-power. Horizontal red bar represents the timeline of sleep deprivation (Day 2, ZT 0-12; 12 h duration). Pink and blue bars under the plots denote significant increase and decrease, respectively, compared to Day 1 ( $P < 0.05$ ). **(d)** Relative EEG power spectra from ZT 12-18 on Day 1 versus Day 2. **(e)** Bar plot showing unaltered plasma corticosterone concentration following sleep treatments. Data are mean  $\pm$  s.e.m..  $n = 6$  biological replicates. Repeated-measures two-way ANOVA (a-d) and one-way ANOVA (e) followed by post-hoc Fisher's Least Significant Difference (LSD) test. \*(black),  $P < 0.01$ ; \*(red),  $P < 0.001$ . For sample sizes and statistics, see Supplementary Data 1. NS: normal sleep, SD: sleep deprived, RS: recovery sleep.

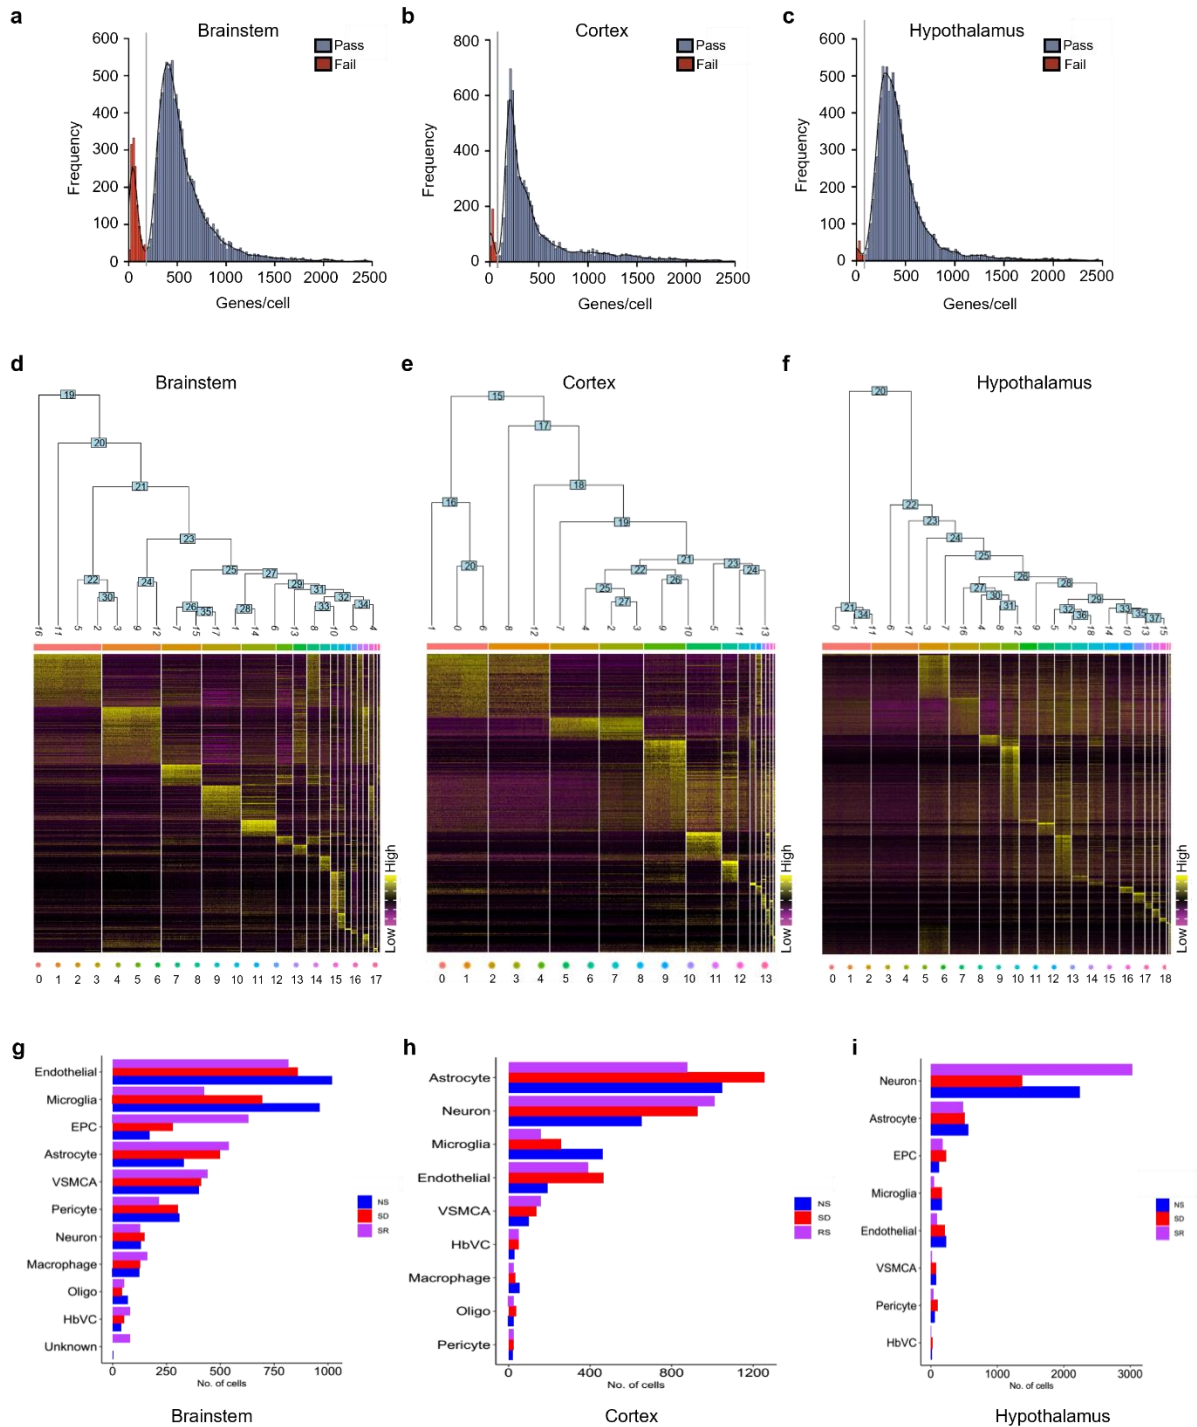

**Supplementary Fig. 2: Quality control and identification of cell clusters based on specific expression patterns in the brainstem, cortex, and hypothalamus**

**a, b, c** Distribution of genes per cell in (a) brainstem, (b) cortex, and (c) hypothalamus. **d, e, f** Heatmap and dendrogram showing distinct expression clusters for gene markers in (d) brainstem, (e) cortex, and (f) hypothalamus. **g, h, i** Bar chart showing the number of cell types identified across Normal sleep (NS), Sleep deprived (SD), and Recovery Sleep (RS) in (g) brainstem, (h) cortex, and (i) hypothalamus.

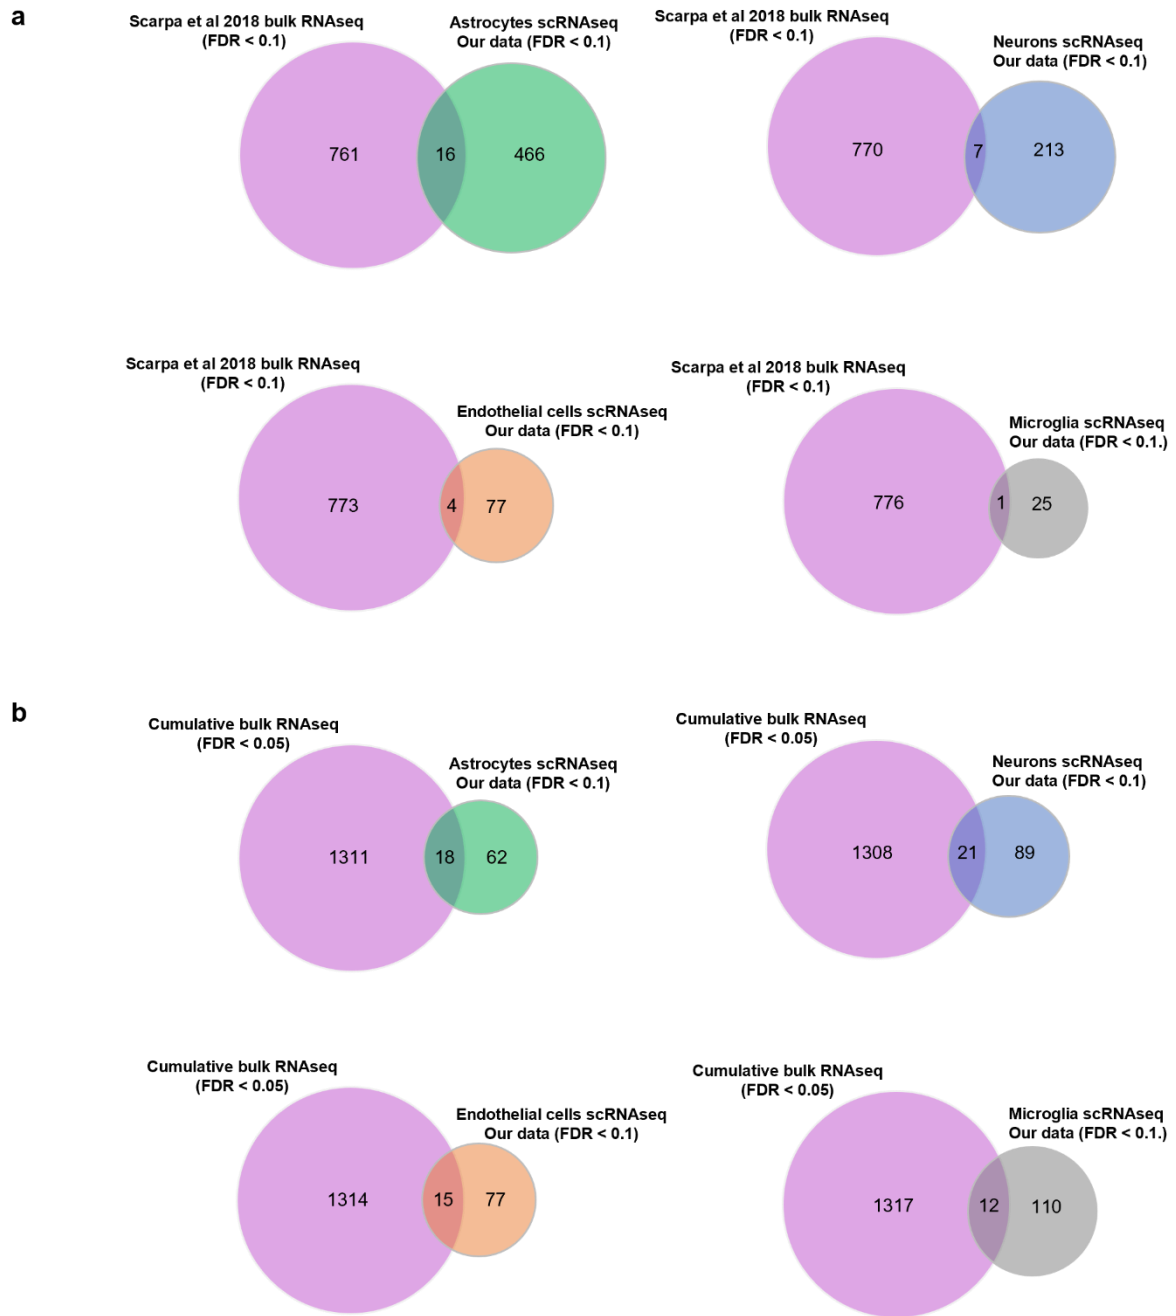

**Supplementary Fig. 3: Cell-type specificity of previously published sleep related transcriptional studies compared to scRNAseq results**

**a, b** Venn diagrams of sleep related transcriptional alterations at cumulative bulk cell and single-cell (astrocytes, neurons, endothelial cells, and microglia) in **(a)** cortex, and **(b)** hypothalamus. Cumulative bulk cell transcription studies were Diessler et al., 2018; Gerstner et al., 2016; Scarpa et al., 2018. See also Supplementary Table 4.

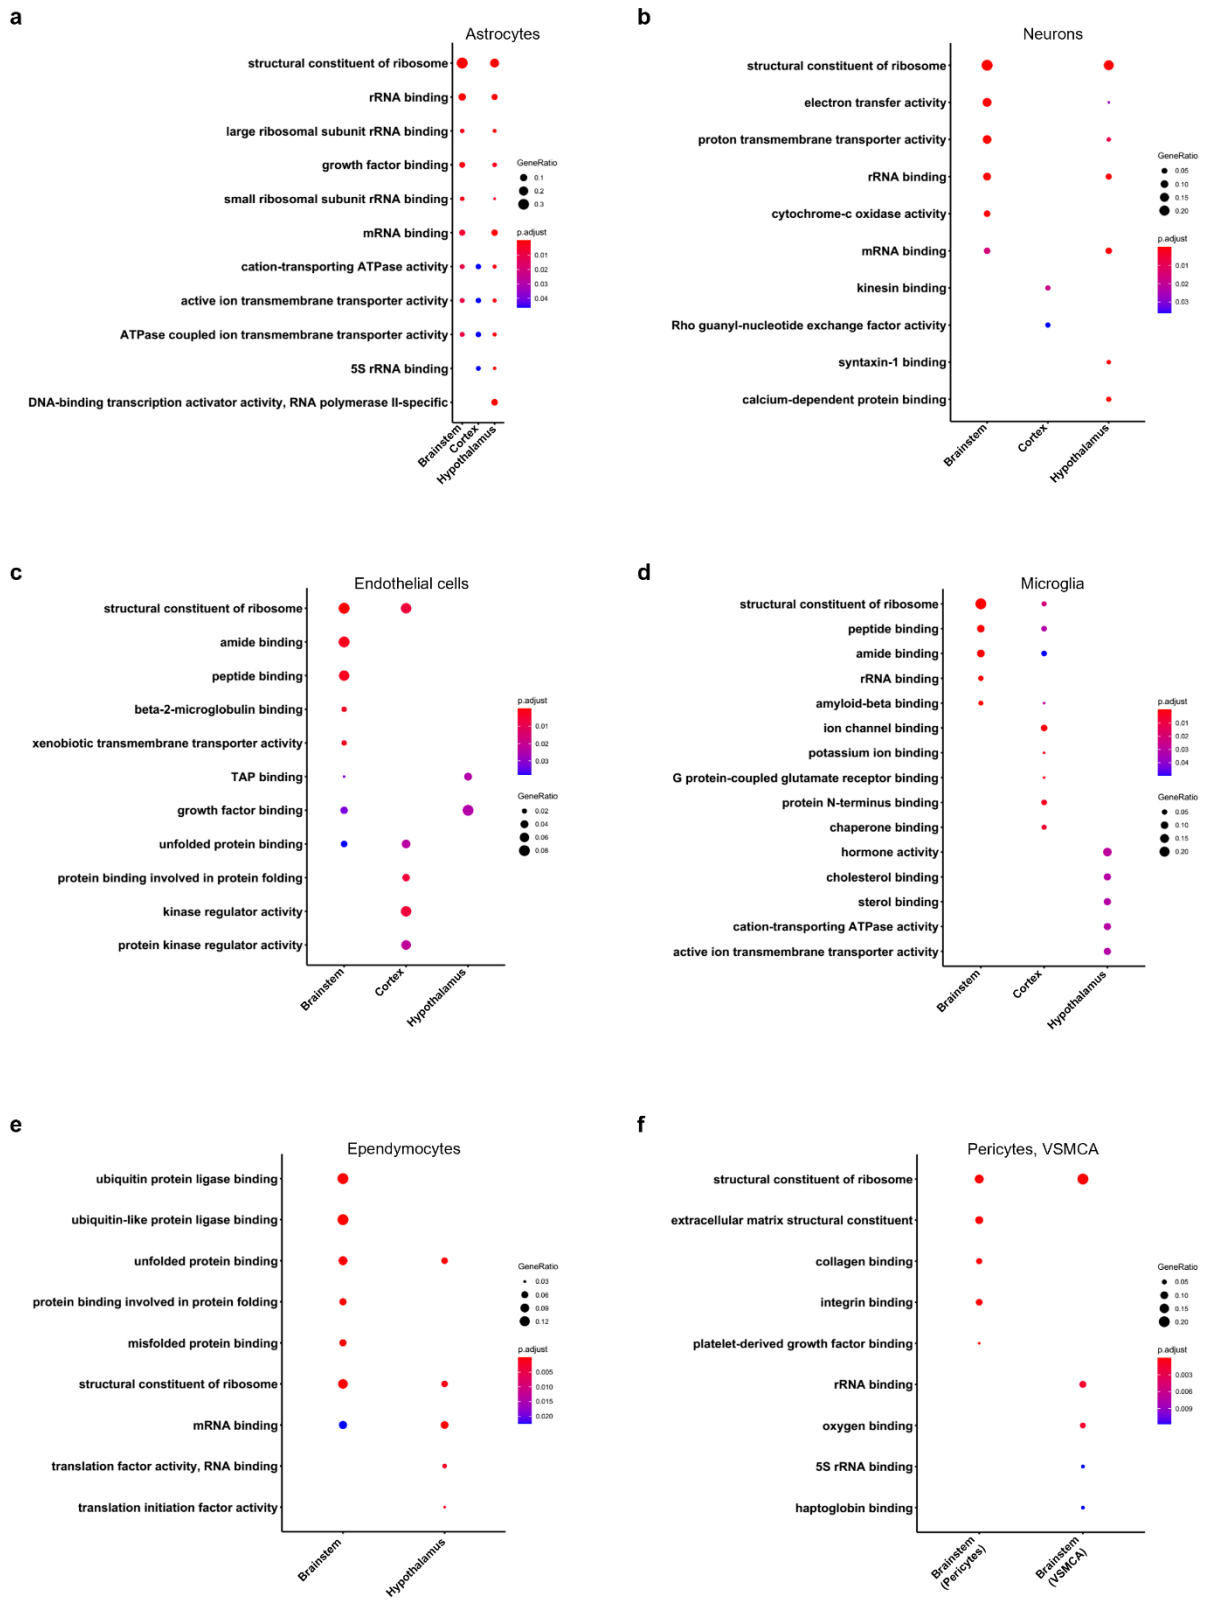

**Supplementary Fig. 4: Molecular functions of differentially expressed genes in the cells from brainstem, cortex, and hypothalamus across sleep treatments**

**a, b, c, d, e, f** Dot plots showing the comparison of significantly enriched (Benjamini-Hochberg adjusted  $P$ -value  $< 0.01$ ) gene ontology (GO) terms of molecular functions in **(a)** astrocyte, **(b)** neuron, **(c)** endothelial cells, **(d)** microglia, **(e)** ependymocytes, **(f)** pericytes and VSMCA of

all three brain regions. Circle size is proportional to gene ratio and level of significance (Benjamini-Hochberg adjusted  $P$ -value) is colour coded.

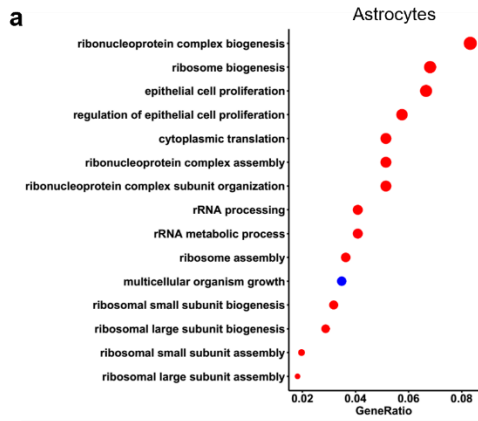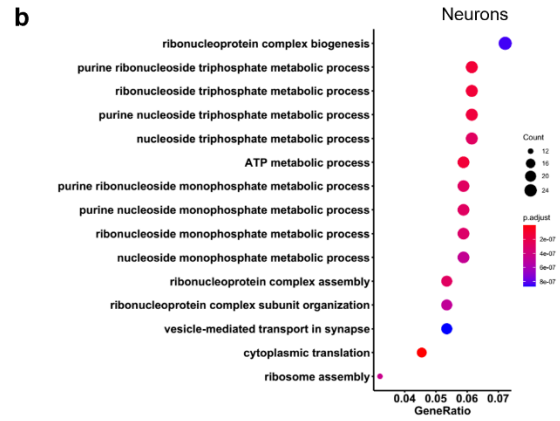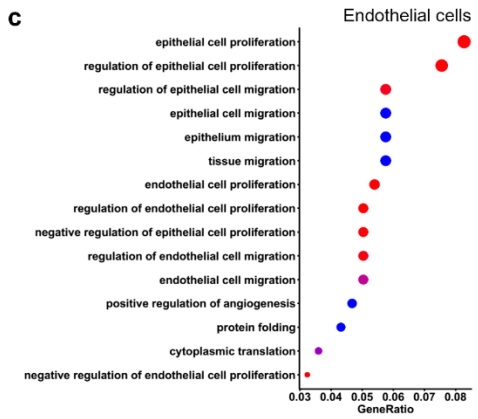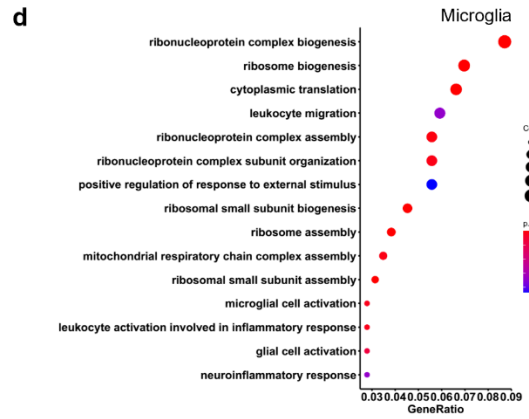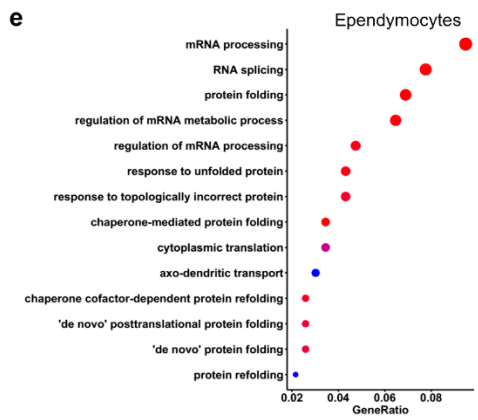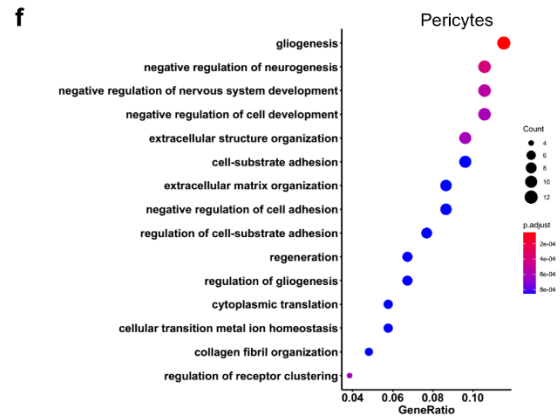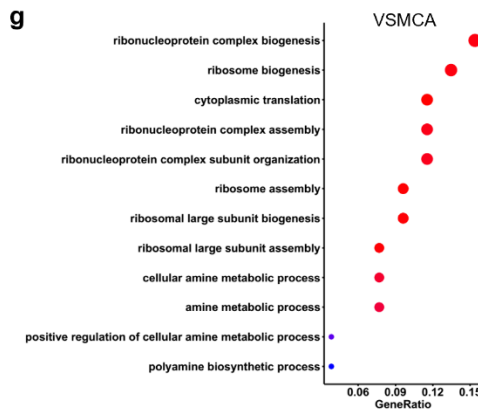

**Supplementary Fig. 5: Biological functions of differentially expressed genes in the cells from brainstem, cortex, and hypothalamus across sleep treatments**

**a, b, c, d, e, f, g** Dot plots showing significantly enriched (Benjamini-Hochberg adjusted  $P$ -value  $< 0.01$ ) gene ontology (GO) terms of biological processes in **(a)** astrocyte, **(b)** neuron, **(c)** endothelial cells, **(d)** microglia, **(e)** ependymocytes, **(f)** pericytes and **(g)** VSMCA. Circle size is proportional to genes count and level of significance (Benjamini-Hochberg adjusted  $P$ -value) is colour coded.



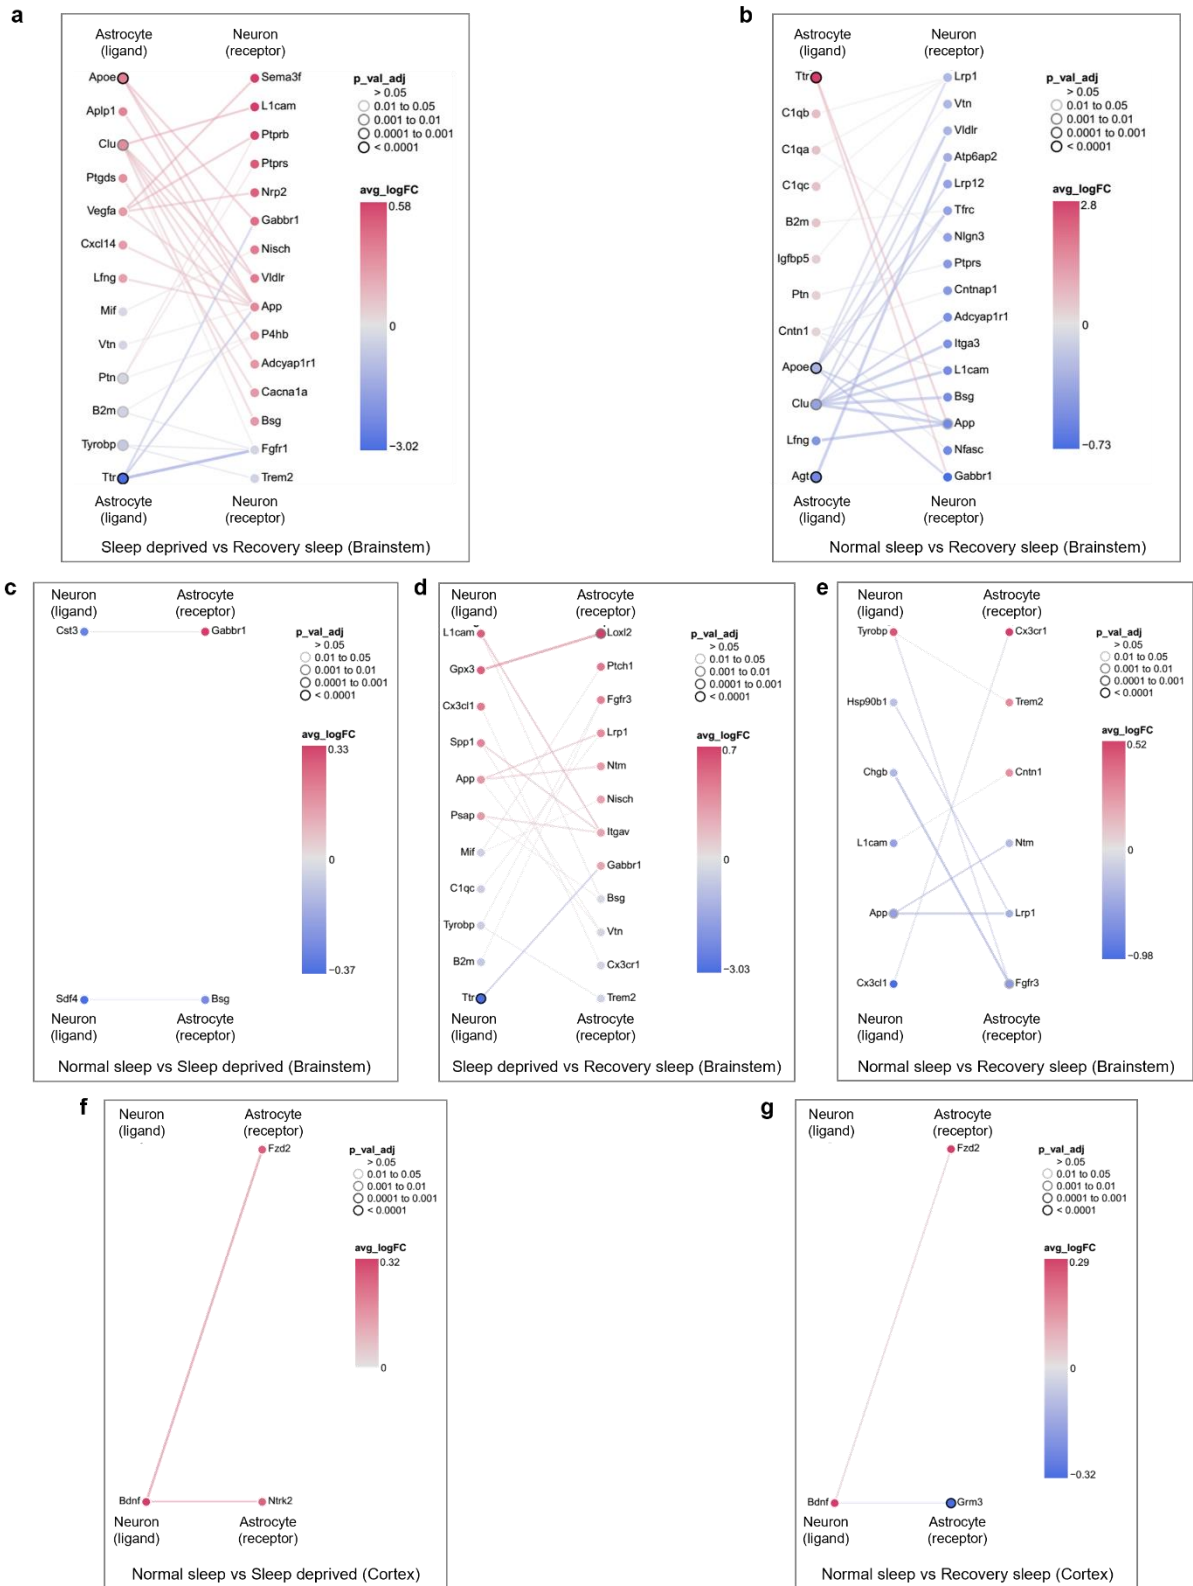

**Supplementary Fig. 6: Sleep need modulates cell-cell communications networks in the brainstem and cortex**

**a, b, c, d, e** Interactions between differentially expressed ligands of astrocytes and receptors of neurons for **(a)** SD versus RS, **(b)** NS versus RS and, ligands of neurons and receptors of

astrocytes for (c) NS versus SD, (d) SD versus RS, and (e) NS versus RS comparisons in the brainstem. f, g Interactions between differentially expressed ligands of neurons and receptors of astrocytes for (f) NS versus SD and (g) NS versus RS comparisons in the cortex. Nodes represent ligands or receptors in astrocytes and neurons, respectively. Node outline thickness indicates the level of significance (Benjamini-Hochberg adjusted *P*-value). Colour of nodes and edges represent the magnitude of alteration in expression (log fold-change, logFC) (see Methods). NS: normal sleep, SD: sleep deprived, RS: recovery sleep.

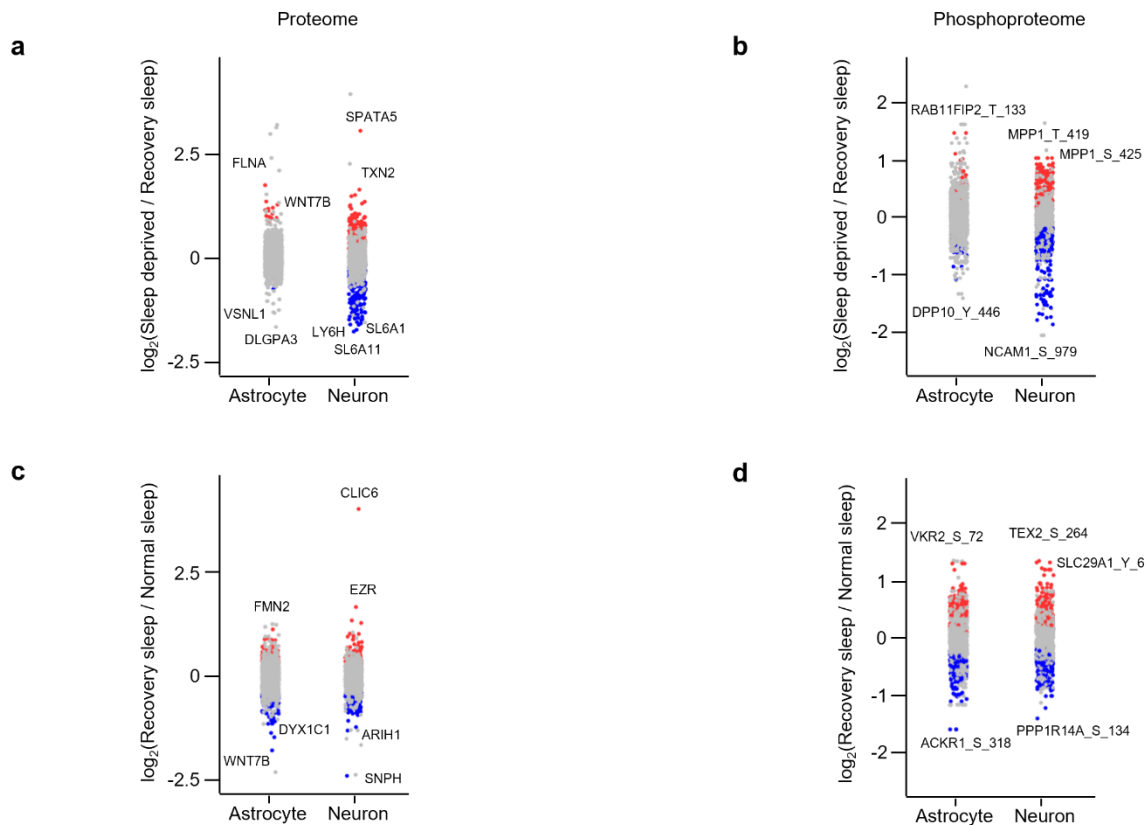

**Supplementary Fig. 7: Translational and post-translational profiles of astrocytes and neurons from cortex across sleep-wake states**

**a, b, c, d** Strip chart showing changes in (a) global and (b) phosphorylated proteins for Sleep Deprived (SD)/Recovery Sleep (RS), whereas (c) and (d) show changes in global and phosphorylated proteins, respectively for Recovery Sleep (RS)/Normal Sleep (NS) comparisons. Unpaired *t*-tests followed by false discovery rate (FDR) analysis were used to compare groups. Significantly upregulated and downregulated protein expression is colour coded with red and blue, respectively (Benjamini-Hochberg adjusted *P*-value < 0.1). Proteins in grey are not significantly changed following sleep treatments.

**a**

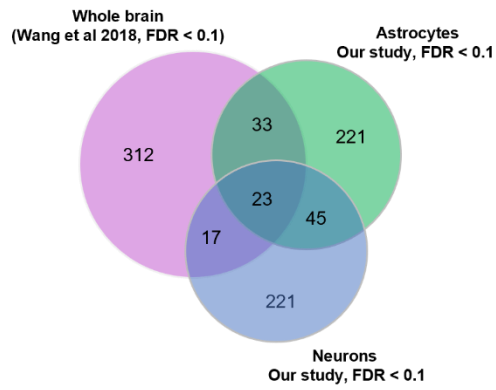

**Supplementary Fig. 8: Cell-type specificity of previously published sleep related translational study compared to scRNAseq results**

**a** Venn diagram of sleep driven alterations in protein phosphorylation in the whole brain and, astrocytes and neurons. Whole brain protein phosphorylation data from Wang et al., 2018. See also Supplementary Table 8.

| <b>Cell type</b>                               | <b>Markers</b>                  |
|------------------------------------------------|---------------------------------|
| Astrocyte                                      | <i>Aldoc</i>                    |
| Ependymocytes                                  | <i>Tmem212, Rarres2</i>         |
| Hemoglobin-expressing vascular cells           | <i>Alas2</i>                    |
| Macrophage                                     | <i>Lyz2</i>                     |
| Microglia                                      | <i>Hexb, Cx3cr1</i>             |
| Neuron Glutamatergic                           | <i>Snap25, Slc17a6, Slc17a7</i> |
| Neuron Other                                   | <i>Snap25, Chga</i>             |
| Neuron GABAergic                               | <i>Snap25, Gad2, Dlk1</i>       |
| Neuron Inhibitory                              | <i>Snap25, Nrnx3</i>            |
| Oligodendrocyte                                | <i>Cldn11</i>                   |
| Pericyte                                       | <i>Vtn</i>                      |
| Vascular smooth muscle cells, arterial (VSMCA) | <i>Acta2</i>                    |

**Supplementary Table 1:**

Summary of cell type classifications in single-cell transcriptomics.

| Brain area   | Cell type   | Significantly altered genes after sleep treatments |
|--------------|-------------|----------------------------------------------------|
| Brainstem    | Astrocyte   | 141                                                |
|              | Endothelial | 169                                                |
|              | EPC         | 83                                                 |
|              | Microglia   | 171                                                |
|              | Neuron      | 84                                                 |
|              | Pericyte    | 124                                                |
|              | VSMCA       | 66                                                 |
| Cortex       | Astrocyte   | 80                                                 |
|              | Endothelial | 92                                                 |
|              | Microglia   | 122                                                |
|              | Neuron      | 110                                                |
| Hypothalamus | Astrocyte   | 482                                                |
|              | Endothelial | 58                                                 |
|              | EPC         | 189                                                |
|              | Microglia   | 25                                                 |
|              | Neuron      | 220                                                |
|              | Pericyte    | 3                                                  |
|              | VSMCA       | 7                                                  |

**Supplementary Table 2:**

Summary of differential gene expression within the cell types of brainstems, cortex, and hypothalamus.

| Brain area   | Cell Type   | NS    | SD    | RS    |
|--------------|-------------|-------|-------|-------|
| Brainstem    | Endothelial | 28.60 | 25.19 | 22.88 |
|              | Microglia   | 27.05 | 20.38 | 11.94 |
|              | VSMCA       | 11.29 | 12.05 | 12.34 |
|              | Astrocyte   | 9.29  | 14.63 | 15.09 |
|              | Pericyte    | 8.73  | 8.83  | 6.04  |
|              | EPC         | 4.81  | 8.15  | 17.73 |
|              | Neuron      | 3.69  | 4.28  | 3.57  |
|              | Macrophage  | 3.52  | 3.75  | 4.47  |
|              | Oligo       | 1.94  | 1.23  | 1.49  |
|              | HbVC        | 1.07  | 1.50  | 2.25  |
|              | Unknown     | 0.03  | 0.00  | 2.19  |
| Cortex       | Astrocyte   | 40.60 | 39.49 | 39.49 |
|              | Neuron      | 25.33 | 29.15 | 29.15 |
|              | Microglia   | 17.83 | 8.10  | 8.10  |
|              | Endothelial | 7.42  | 14.59 | 14.59 |
|              | VSMCA       | 3.85  | 4.29  | 4.29  |
|              | Macrophage  | 2.10  | 1.04  | 1.04  |
|              | HbVC        | 1.13  | 1.51  | 1.51  |
|              | Oligo       | 0.97  | 1.13  | 1.13  |
|              | Pericyte    | 0.78  | 0.69  | 0.69  |
| Hypothalamus | Neuron      | 64.47 | 50.78 | 77.90 |
|              | Astrocyte   | 16.04 | 18.85 | 12.50 |
|              | Endothelial | 6.47  | 7.69  | 2.31  |
|              | Microglia   | 4.92  | 6.10  | 1.26  |
|              | EPC         | 3.51  | 8.61  | 4.54  |
|              | VSMCA       | 2.36  | 3.10  | 0.28  |
|              | Pericyte    | 1.72  | 3.73  | 0.95  |
|              | HbVC        | 0.52  | 1.15  | 0.26  |

**Supplementary Table 3:**

Percentage of cell types in three sleep conditions from brainstem, cortex, and hypothalamus.

| Brain area_Cell-type          | Differentially altered genes in bulk RNAseq and scRNAseq                                                                                                       | Upregulated genes                                                                                                      | Downregulated genes                                   |
|-------------------------------|----------------------------------------------------------------------------------------------------------------------------------------------------------------|------------------------------------------------------------------------------------------------------------------------|-------------------------------------------------------|
| Cortex_Astrocyte              | <i>Sdc4, Dbp, Timp4, Srsf2, Camk2n1, Htra1, Spry2, Mt2, Mfsd2a, Tmem100, Fam107a, Gjb6, Nim1k, Thrsp, Tsc22d3, Lrrc8a, Mat2a, Grm3</i>                         | <i>Sdc4, Timp4, Srsf2, Camk2n1, Htra1, Spry2, Mt2, Mfsd2a, Tmem100, Fam107a, Gjb6, Thrsp, Tsc22d3, Lrrc8a, Mat2a</i>   | <i>Dbp, Nim1k, Grm3</i>                               |
| Cortex_Neuron                 | <i>Cbfa2t3, Sipa1l1, Chka, Llph, Sox1,1 Dpp10, Camk2n1, Frmd6, Bhlhe40, Spred2, Hsph1, Fscn1, Stmn4, Trio, Pja2, Mcf2l, Tll7, Pdp1, Mast3, Homer1, Runx1t1</i> | <i>Cbfa2t3, Sipa1l1, Chka, Llph, Camk2n1, Frmd6, Bhlhe40, Spred2, Hsph1, Fscn1, Trio, Pdp1, Mast3, Homer1, Runx1t1</i> | <i>Sox11, Dpp10, Tll7</i>                             |
| Cortex_Endothelial cell       | <i>Itm2a, Pop5, Adgrl4, Srsf2, Camk2n1, Hnmpf, Mat2b, Sgms1, Klf4, Klf13, Hspb1, Gkn3, Tsc22d3, 8430408G22Rik, Mat2a</i>                                       | <i>Adgrl4, Srsf2, Camk2n1, Hnmpf, Sgms1, Klf13, Tsc22d3, 8430408G22Rik, Mat2a</i>                                      | <i>Itm2a, Gkn3</i>                                    |
| Cortex_Microglia              | <i>Rassf2, Sgk1, Krit1, Camk2n1, Spry2, Hexb, Mt2, Dcl1, Camk2a, Sdf2l1, Tsc22d3, Mat2a</i>                                                                    | <i>Rassf2, Sgk1, Krit1, Camk2n1, Spry2, Mt2, Dcl1, Camk2a, Tsc22d3, Mat2a</i>                                          | <i>Sdf2l1</i>                                         |
| Hypothalamus_Astrocyte        | <i>Ccnd2, H2-D1, Ncl, Slc7a10, Msl1, Kcnk2, Tsc22d1, Rps3, Socs3, Klf6, Errfi1, Slc6a6, Hspb1, Hnrmpa1, Wdr6, Ahi1</i>                                         | <i>Socs3</i>                                                                                                           | <i>Kcnk2, H2-D1, Ncl, Hnrmpa1, Wdr6, Msl1, Slc6a6</i> |
| Hypothalamus_Neuron           | <i>Ccnd2, Cirbp, Arl6ip1, Serf2, Ncam1, Nrsn2, Per3</i>                                                                                                        | <i>Cirbp, Serf2, Ncam1, Nrsn2</i>                                                                                      | <i>Ccnd2, Arl6ip1, Per3</i>                           |
| Hypothalamus_Endothelial cell | <i>Tnfaip2, Serf2, H2-D1, Fabp4</i>                                                                                                                            |                                                                                                                        | <i>Tnfaip2, Serf2, H2-D1, Fabp4</i>                   |
| Hypothalamus_Microglia        | <i>Ccnd2</i>                                                                                                                                                   |                                                                                                                        | <i>Ccnd2</i>                                          |

#### Supplementary Table 4:

Cell-type specificity of previously reported sleep-related upregulated and downregulated genes in the cortex and hypothalamus.

| Brain area   | TF     | co-expressed gene                                                                                                            | GO terms                                                           | FDR      |
|--------------|--------|------------------------------------------------------------------------------------------------------------------------------|--------------------------------------------------------------------|----------|
| Brainstem    | Sox2   | <i>Ikzf2, Nr2f1</i><br><i>Sox2, Sox9</i><br><i>Trps1, Cd36</i><br><i>Gja1, Hey1</i><br><i>Kcnk2, Nkx6-1</i><br><i>Zbtb20</i> | Negative regulation of cellular macromolecule biosynthetic process | 0.0023   |
|              | Nfe2l1 | <i>Atp1b1, Grin1</i><br><i>Tnfrsf21, Scn1b</i><br><i>Rnf10</i>                                                               | Regulation of system process                                       | 0.0395   |
|              | Mafk   | <i>Csf1r, Ralb</i><br><i>Rgs2, Pik3r1</i><br><i>Adrb2, Zeb2</i>                                                              | Regulation of kinase activity                                      | 0.00020  |
|              | Foxj1  | <i>Cxzc5, Ezr</i><br><i>Hmgbl1, Nfix</i><br><i>Txnip</i>                                                                     | Negative regulation of RNA metabolic process                       | 0.0253   |
|              | Zic1   | <i>Lgf2, Lgfbp2</i><br><i>Nr2f2, Pdgfrb</i>                                                                                  | Cellular response to endogenous stimulus                           | 0.0162   |
|              | Lef1   | <i>Tshz1, Lef1</i>                                                                                                           | Secondary palate development                                       | 0.0202   |
| Cortex       | Tef    | <i>Susd4, Golga4</i>                                                                                                         | Chromatin remodelling system <sup>64</sup>                         | 0.0392   |
|              | Hlf    | <i>Hlf, Csnk1d</i>                                                                                                           | Biological rhythms                                                 | 0.0345   |
|              | Cebpb  | <i>Cebpb, Hes1</i>                                                                                                           | Regulation of hemopoiesis                                          | 0.0039   |
|              | Sox9   | <i>Fgfr1, Sox9</i><br><i>Hes5, Ppargc1a</i>                                                                                  | Regulation of protein phosphorylation                              | 0.0019   |
| Hypothalamus | Atf3   | <i>Fos, Jun</i><br><i>Junb, Fosb</i><br><i>Dusp1, Actg1</i>                                                                  | Response to calcium ion                                            | 1.04e-07 |
|              | Fosb   | <i>Fos, Jun</i><br><i>Junb, Jund</i><br><i>Klf4, Lmna</i><br><i>Hspb1, Zfp36</i><br><i>Irs2, Ptfir</i><br><i>Rorc</i>        | Regulation of cell death                                           | 3.25e-08 |
|              | Mef2c  | <i>Acta2, Tpm2</i><br><i>Mef2c, Chga</i>                                                                                     | Muscle system process                                              | 0.0037   |

### Supplementary Table 5:

Gene annotation enrichment analysis results for uniquely expressed transcription factors and co-expressed target genes from cells in sleep-deprived mice.



| <b>Astrocyte (total expressed global proteins)</b>                  | <b>Astrocytes (differentially expressed global proteins across sleep treatments)</b> |
|---------------------------------------------------------------------|--------------------------------------------------------------------------------------|
| GOBP:0006091: generation of precursor metabolites and energy        | GOBP:0050808: synapse organization                                                   |
| GOBP:0050808: synapse organization                                  | GOBP:0061572: actin filament bundle organization                                     |
| GOBP:0043254: regulation of protein complex assembly                | GOBP:0043270: positive regulation of ion transport                                   |
| GOBP:0015980: energy derivation by oxidation of organic compounds   | GOBP:0050803: regulation of synapse structure or activity                            |
| GOBP:1990778: protein localization to cell periphery                | GOBP:0032535: regulation of cellular component size                                  |
| GOBP:0001505: regulation of neurotransmitter levels                 | GOBP:1902414: protein localization to cell junction                                  |
| GOBP:0006887: exocytosis                                            | GOBP:0034776: response to histamine                                                  |
| GOBP:0045333: cellular respiration                                  |                                                                                      |
| GOBP:0046034: ATP metabolic process                                 |                                                                                      |
| GOBP:0031346: positive regulation of cell projection organization   |                                                                                      |
| GOBP:0032535: regulation of cellular component size                 |                                                                                      |
| GOBP:0098693: regulation of synaptic vesicle cycle                  |                                                                                      |
| GOBP:0032271: regulation of protein polymerization                  |                                                                                      |
| GOBP:0010256: endomembrane system organization                      |                                                                                      |
| GOBP:0007015: actin filament organization                           |                                                                                      |
| GOMF:0003779: actin binding                                         | GOMF:0003779: actin binding                                                          |
| GOMF:0050662: coenzyme binding                                      | GOMF:0043177: organic acid binding                                                   |
| GOMF:0051082: unfolded protein binding                              | GOMF:0022836: gated channel activity                                                 |
| GOMF:0032549: ribonucleoside binding                                | GOMF:0005216: ion channel activity                                                   |
| GOMF:0003924: GTPase activity                                       | GOMF:0005244: voltage-gated ion channel activity                                     |
| GOMF:0001882: nucleoside binding                                    | GOMF:0022832: voltage-gated channel activity                                         |
| GOMF:0003735: structural constituent of ribosome                    | GOMF:0015267: channel activity                                                       |
| GOMF:0005525: GTP binding                                           | GOMF:0022803: passive transmembrane transporter activity                             |
| GOMF:0001883: purine nucleoside binding                             |                                                                                      |
| GOMF:0003729: mRNA binding                                          |                                                                                      |
| GOMF:0005516: calmodulin binding                                    |                                                                                      |
| GOMF:0035254: glutamate receptor binding                            |                                                                                      |
| GOMF:0042625: ATPase coupled ion transmembrane transporter activity |                                                                                      |
| GOMF:0000149: SNARE binding                                         |                                                                                      |
| GOMF:0051087: chaperone binding                                     |                                                                                      |
| GOCC:0043209: myelin sheath                                         | GOCC:0032432: actin filament bundle                                                  |
| GOCC:0099572: postsynaptic specialization                           | GOCC:0015629: actin cytoskeleton                                                     |
| GOCC:0005743: mitochondrial inner membrane                          | GOCC:0001725: stress fiber                                                           |
| GOCC:0019866: organelle inner membrane                              | GOCC:0097517: contractile actin filament bundle                                      |
| GOCC:0008021: synaptic vesicle                                      | GOCC:0042641: actomyosin                                                             |
| GOCC:0070382: exocytic vesicle                                      | GOCC:0005884: actin filament                                                         |
| GOCC:0030133: transport vesicle                                     | GOCC:0099572: postsynaptic specialization                                            |
| GOCC:0015629: actin cytoskeleton                                    |                                                                                      |
| GOCC:0098798: mitochondrial protein complex                         |                                                                                      |
| GOCC:0031252: cell leading edge                                     |                                                                                      |
| GOCC:0030659: cytoplasmic vesicle membrane                          |                                                                                      |
| GOCC:0012506: vesicle membrane                                      |                                                                                      |
| GOCC:0005938: cell cortex                                           |                                                                                      |
| GOCC:0030658: transport vesicle membrane                            |                                                                                      |
| GOCC:0022626: cytosolic ribosome                                    |                                                                                      |

### Supplementary Table 6:

Functional annotations of total and differentially expressed global proteins in astrocytes across sleep treatments.

| Neurons (total expressed global proteins)                         | Neurons (differentially expressed global proteins across sleep treatments)                          |
|-------------------------------------------------------------------|-----------------------------------------------------------------------------------------------------|
| GOBP:0006091: generation of precursor metabolites and energy      | GOBP:0099504: synaptic vesicle cycle                                                                |
| GOBP:0043254: regulation of protein complex assembly              | GOBP:0099003: vesicle-mediated transport in synapse                                                 |
| GOBP:0046034: ATP metabolic process                               | GOBP:0001505: regulation of neurotransmitter levels                                                 |
| GOBP:0008380: RNA splicing                                        | GOBP:0006836: neurotransmitter transport                                                            |
| GOBP:0006897: endocytosis                                         | GOBP:0036465: synaptic vesicle recycling                                                            |
| GOBP:0007015: actin filament organization                         | GOBP:0140029: exocytic process                                                                      |
| GOBP:0006397: mRNA processing                                     | GOBP:0006897: endocytosis                                                                           |
| GOBP:0015980: energy derivation by oxidation of organic compounds | GOBP:0007269: neurotransmitter secretion                                                            |
| GOBP:0045333: cellular respiration                                | GOBP:0099643: signal release from synapse                                                           |
| GOBP:0032271: regulation of protein polymerization                | GOBP:0097479: synaptic vesicle localization                                                         |
| GOBP:0001505: regulation of neurotransmitter levels               | GOBP:0048488: synaptic vesicle endocytosis                                                          |
| GOBP:1902903: regulation of supramolecular fiber organization     | GOBP:0140238: presynaptic endocytosis                                                               |
| GOBP:0051258: protein polymerization                              | GOBP:0006898: receptor-mediated endocytosis                                                         |
| GOBP:0099003: vesicle-mediated transport in synapse               | GOBP:0016082: synaptic vesicle priming                                                              |
| GOBP:0099504: synaptic vesicle cycle                              | GOBP:0098693: regulation of synaptic vesicle cycle                                                  |
| GOMF:0003779: actin binding                                       | GOMF:0019829: cation-transporting ATPase activity                                                   |
| GOMF:0051015: actin filament binding                              | GOMF:0042625: ATPase coupled ion transmembrane transporter activity                                 |
| GOMF:0003729: mRNA binding                                        | GOMF:0015662: ATPase activity, coupled to transmembrane movement of ions, phosphorylative mechanism |
| GOMF:0005200: structural constituent of cytoskeleton              | GOMF:0000149: SNARE binding                                                                         |
| GOMF:0050662: coenzyme binding                                    | GOMF:0009678: hydrogen-translocating pyrophosphatase activity                                       |
| GOMF:0031072: heat shock protein binding                          | GOMF:0022853: active ion transmembrane transporter activity                                         |
| GOMF:0003735: structural constituent of ribosome                  | GOMF:0042626: ATPase activity, coupled to transmembrane movement of substances                      |
| GOMF:0019001: guanyl nucleotide binding                           | GOMF:0015399: primary active transmembrane transporter activity                                     |
| GOMF:0032561: guanyl ribonucleotide binding                       | GOMF:0017075: syntaxin-1 binding                                                                    |
| GOMF:0001882: nucleoside binding                                  | GOMF:0051117: ATPase binding                                                                        |
| GOMF:0032550: purine ribonucleoside binding                       | GOMF:0008022: protein C-terminus binding                                                            |
| GOMF:0032549: ribonucleoside binding                              | GOMF:0015077: monovalent inorganic cation transmembrane transporter activity                        |
| GOMF:0031625: ubiquitin protein ligase binding                    | GOMF:0044769: ATPase activity, coupled to transmembrane movement of ions, rotational mechanism      |
| GOMF:0001883: purine nucleoside binding                           | GOMF:0046961: proton-transporting ATPase activity, rotational mechanism                             |
| GOMF:0044389: ubiquitin-like protein ligase binding               | GOMF:0008553: proton-exporting ATPase activity, phosphorylative mechanism                           |
| GOCC:0043209: myelin sheath                                       | GOCC:0043209: myelin sheath                                                                         |
| GOCC:0015629: actin cytoskeleton                                  | GOCC:0070382: exocytic vesicle                                                                      |
| GOCC:0005743: mitochondrial inner membrane                        | GOCC:0008021: synaptic vesicle                                                                      |
| GOCC:0019866: organelle inner membrane                            | GOCC:0030133: transport vesicle                                                                     |
| GOCC:0014069: postsynaptic density                                | GOCC:0048786: presynaptic active zone                                                               |
| GOCC:0032279: asymmetric synapse                                  | GOCC:0042734: presynaptic membrane                                                                  |
| GOCC:0098984: neuron to neuron synapse                            | GOCC:0150034: distal axon                                                                           |
| GOCC:0031252: cell leading edge                                   | GOCC:0030672: synaptic vesicle membrane                                                             |
| GOCC:0099572: postsynaptic specialization                         | GOCC:0099501: exocytic vesicle membrane                                                             |
| GOCC:0005938: cell cortex                                         | GOCC:0012506: vesicle membrane                                                                      |
| GOCC:0070382: exocytic vesicle                                    | GOCC:0030658: transport vesicle membrane                                                            |
| GOCC:0008021: synaptic vesicle                                    | GOCC:0030659: cytoplasmic vesicle membrane                                                          |
| GOCC:0022626: cytosolic ribosome                                  | GOCC:0098984: neuron to neuron synapse                                                              |
| GOCC:0098800: inner mitochondrial membrane protein complex        | GOCC:0030426: growth cone                                                                           |
| GOCC:0030133: transport vesicle                                   | GOCC:0044306: neuron projection terminus                                                            |

### Supplementary Table 7:

Functional annotations of total and differentially expressed global proteins in neurons across sleep treatments.

| <b>Cell-type</b> | <b>Phosphorylated proteins</b>                                                                                                                                                                                                                                       |
|------------------|----------------------------------------------------------------------------------------------------------------------------------------------------------------------------------------------------------------------------------------------------------------------|
| Astrocytes       | <i>Ryr2, Map4k4, Stxbp5l, Camkv, Map7d1, Camsap1, Hid1, Pclo, Slc9a1, Rab11fip2, Rph3a, Ppp1r12a, Rap1gap, Mical3, Map1b, Bsn, Srgap3, Otud7a, Lysmd2, Mark4, Slc7a14, Htt, Pde4a, Ank2, Gtpbp1, Aak1, Amer2, Bclaf1, Csde1, Gm996, 2010300C02Rik, Ciapin1, Wdr7</i> |
| Neurons          | <i>Pdha1, Ppp1r12b, Caskin1, Git2, Pi4ka, Map4, Clasp2, Tnks1bp1, Mark2, Oxr1, Gprin3, Pde4b, Plec, Raph1, Pkp4, Wnk2, Madd</i>                                                                                                                                      |

### **Supplementary Table 8:**

Cell-type specificity to previously known sleep related phosphorylated proteins in cortex.

| <b>Astrocyte (total expressed phosphorylated proteins)</b>        | <b>Astrocytes (differentially expressed phosphorylated proteins across sleep treatments)</b> |
|-------------------------------------------------------------------|----------------------------------------------------------------------------------------------|
| GOBP:0050808: synapse organization                                | GOBP:0008361: regulation of cell size                                                        |
| GOBP:0007269: neurotransmitter secretion                          | GOBP:0032535: regulation of cellular component size                                          |
| GOBP:1902903: regulation of supramolecular fiber organization     | GOBP:0050808: synapse organization                                                           |
| GOBP:0043254: regulation of protein complex assembly              | GOBP:0007269: neurotransmitter secretion                                                     |
| GOBP:0007015: actin filament organization                         | GOBP:0048588: developmental cell growth                                                      |
| GOBP:0006887: exocytosis                                          | GOBP:0043254: regulation of protein complex assembly                                         |
| GOBP:1901880: negative regulation of protein depolymerization     | GOBP:0060560: developmental growth involved in morphogenesis                                 |
| GOBP:1990778: protein localization to cell periphery              | GOBP:0010769: regulation of cell morphogenesis involved in differentiation                   |
| GOBP:0070507: regulation of microtubule cytoskeleton organization | GOBP:0009187: cyclic nucleotide metabolic process                                            |
| GOBP:0032271: regulation of protein polymerization                | GOBP:0007015: actin filament organization                                                    |
| GOBP:0050803: regulation of synapse structure or activity         | GOBP:0061387: regulation of extent of cell growth                                            |
| GOBP:0043624: cellular protein complex disassembly                | GOBP:1990778: protein localization to cell periphery                                         |
| GOBP:0006897: endocytosis                                         | GOBP:0032271: regulation of protein polymerization                                           |
| GOBP:0051656: establishment of organelle localization             | GOBP:0007163: establishment or maintenance of cell polarity                                  |
| GOBP:0032535: regulation of cellular component size               | GOBP:0043149: stress fiber assembly                                                          |
| GOMF:0051015: actin filament binding                              | GOMF:0005516: calmodulin binding                                                             |
| GOMF:0031267: small GTPase binding                                | GOMF:0003779: actin binding                                                                  |
| GOMF:0005516: calmodulin binding                                  | GOMF:0042301: phosphate ion binding                                                          |
| GOMF:0017016: Ras GTPase binding                                  |                                                                                              |
| GOMF:0015631: tubulin binding                                     |                                                                                              |
| GOMF:0019902: phosphatase binding                                 |                                                                                              |
| GOMF:0005543: phospholipid binding                                |                                                                                              |
| GOMF:0003712: transcription coregulator activity                  |                                                                                              |
| GOMF:0005096: GTPase activator activity                           |                                                                                              |
| GOMF:0008017: microtubule binding                                 |                                                                                              |
| GOMF:0004674: protein serine/threonine kinase activity            |                                                                                              |
| GOMF:0019903: protein phosphatase binding                         |                                                                                              |
| GOMF:0060090: molecular adaptor activity                          |                                                                                              |
| GOMF:0008022: protein C-terminus binding                          |                                                                                              |
| GOMF:0044325: ion channel binding                                 |                                                                                              |
| GOCC:0099572: postsynaptic specialization                         | GOCC:0099572: postsynaptic specialization                                                    |
| GOCC:0031252: cell leading edge                                   | GOCC:0098589: membrane region                                                                |
| GOCC:0015629: actin cytoskeleton                                  | GOCC:0008021: synaptic vesicle                                                               |
| GOCC:0005938: cell cortex                                         | GOCC:0070382: exocytic vesicle                                                               |
| GOCC:0099568: cytoplasmic region                                  | GOCC:0031252: cell leading edge                                                              |
| GOCC:0005874: microtubule                                         | GOCC:0030426: growth cone                                                                    |
| GOCC:0008021: synaptic vesicle                                    | GOCC:0015629: actin cytoskeleton                                                             |
| GOCC:0070382: exocytic vesicle                                    | GOCC:0030427: site of polarized growth                                                       |
| GOCC:0030427: site of polarized growth                            | GOCC:0030659: cytoplasmic vesicle membrane                                                   |
| GOCC:0030426: growth cone                                         | GOCC:0019898: extrinsic component of membrane                                                |
| GOCC:0030863: cortical cytoskeleton                               | GOCC:0030133: transport vesicle                                                              |
| GOCC:0031312: extrinsic component of organelle membrane           | GOCC:0012506: vesicle membrane                                                               |
| GOCC:0030055: cell-substrate junction                             | GOCC:0099522: region of cytosol                                                              |
| GOCC:0099522: region of cytosol                                   | GOCC:0030118: clathrin coat                                                                  |
| GOCC:0043209: myelin sheath                                       | GOCC:0099501: exocytic vesicle membrane                                                      |

### Supplementary Table 9:

Functional annotations of total and differentially expressed phosphorylated proteins in astrocytes across sleep treatments.

| Neuron (total expressed phosphorylated proteins)             | Neuron (differentially expressed phosphorylated proteins across sleep treatments) |
|--------------------------------------------------------------|-----------------------------------------------------------------------------------|
| GOBP:0032886: regulation of microtubule-based process        | GOBP:0019932: second messenger-mediated signaling                                 |
| GOBP:0007015: actin filament organization                    | GOBP:0097479: synaptic vesicle localization                                       |
| GOBP:0007163: establishment or maintenance of cell polarity  | GOBP:0019722: calcium-mediated signaling                                          |
| GOBP:0034329: cell junction assembly                         | GOBP:0099504: synaptic vesicle cycle                                              |
| GOBP:0010639: negative regulation of organelle organization  | GOBP:0099003: vesicle-mediated transport in synapse                               |
| GOBP:0007264: small GTPase mediated signal transduction      | GOBP:0043254: regulation of protein complex assembly                              |
| GOBP:0051656: establishment of organelle localization        | GOBP:0098693: regulation of synaptic vesicle cycle                                |
| GOBP:0043244: regulation of protein complex disassembly      | GOBP:0051656: establishment of organelle localization                             |
| GOBP:0097479: synaptic vesicle localization                  | GOBP:0006887: exocytosis                                                          |
| GOBP:0099003: vesicle-mediated transport in synapse          | GOBP:0007269: neurotransmitter secretion                                          |
| GOBP:0099504: synaptic vesicle cycle                         | GOBP:0099643: signal release from synapse                                         |
| GOBP:0016358: dendrite development                           | GOBP:0050808: synapse organization                                                |
| GOBP:0006397: mRNA processing                                | GOBP:0051258: protein polymerization                                              |
| GOBP:0008088: axo-dendritic transport                        | GOBP:0070507: regulation of microtubule cytoskeleton organization                 |
| GOBP:0050808: synapse organization                           | GOBP:0007044: cell-substrate junction assembly                                    |
| GOMF:0051015: actin filament binding                         | GOMF:0003779: actin binding                                                       |
| GOMF:0017016: Ras GTPase binding                             |                                                                                   |
| GOMF:0005516: calmodulin binding                             |                                                                                   |
| GOMF:0017048: Rho GTPase binding                             |                                                                                   |
| GOMF:0019903: protein phosphatase binding                    |                                                                                   |
| GOMF:0005088: Ras guanyl-nucleotide exchange factor activity |                                                                                   |
| GOMF:0015631: tubulin binding                                |                                                                                   |
| GOMF:0005543: phospholipid binding                           |                                                                                   |
| GOMF:0019902: phosphatase binding                            |                                                                                   |
| GOMF:0005089: Rho guanyl-nucleotide exchange factor activity |                                                                                   |
| GOMF:0008017: microtubule binding                            |                                                                                   |
| GOMF:0035091: phosphatidylinositol binding                   |                                                                                   |
| GOMF:0004112: cyclic-nucleotide phosphodiesterase activity   |                                                                                   |
| GOMF:0003712: transcription coregulator activity             |                                                                                   |
| GOMF:0004697: protein kinase C activity                      |                                                                                   |
| GOCC:0015629: actin cytoskeleton                             | GOCC:0014069: postsynaptic density                                                |
| GOCC:0032279: asymmetric synapse                             | GOCC:0032279: asymmetric synapse                                                  |
| GOCC:0099572: postsynaptic specialization                    | GOCC:0098984: neuron to neuron synapse                                            |
| GOCC:0098984: neuron to neuron synapse                       | GOCC:0099572: postsynaptic specialization                                         |
| GOCC:0031252: cell leading edge                              | GOCC:0031252: cell leading edge                                                   |
| GOCC:0005911: cell-cell junction                             | GOCC:0015629: actin cytoskeleton                                                  |
| GOCC:0001725: stress fiber                                   | GOCC:0005874: microtubule                                                         |
| GOCC:0005874: microtubule                                    | GOCC:0150034: distal axon                                                         |
| GOCC:0005938: cell cortex                                    | GOCC:0008021: synaptic vesicle                                                    |
| GOCC:0005925: focal adhesion                                 | GOCC:0030133: transport vesicle                                                   |
| GOCC:0030863: cortical cytoskeleton                          | GOCC:0070382: exocytic vesicle                                                    |
| GOCC:0150034: distal axon                                    | GOCC:0044306: neuron projection terminus                                          |
| GOCC:0034399: nuclear periphery                              | GOCC:0098858: actin-based cell projection                                         |
| GOCC:0099568: cytoplasmic region                             | GOCC:0099522: region of cytosol                                                   |
| GOCC:0030427: site of polarized growth                       | GOCC:0005911: cell-cell junction                                                  |

### Supplementary Table 10:

Functional annotations of total and differentially expressed phosphorylated proteins in neurons across sleep treatments.

## Supplementary References

1. Diessler, S. *et al.* A systems genetics resource and analysis of sleep regulation in the mouse. *Plos Biol* 16, e2005750 (2018).
2. Scarpa, J. R. *et al.* Cross-species systems analysis identifies gene networks differentially altered by sleep loss and depression. *Sci Adv* 4, eaat1294 (2018).
3. Gerstner, J. R. *et al.* Removal of unwanted variation reveals novel patterns of gene expression linked to sleep homeostasis in murine cortex. *Bmc Genomics* 17, 727 (2016).
